# Supplementary material for: High-throughput lipidomics enables discovery of the mode of action of huaxian capsule impacting the metabolism of sepsis
Source: Royal Society of Chemistry journal article supplement (doi:10.1039/c7ra07873k), 2017-01-01
Supplement: c7ra07873k1.pdf [file c7ra07873k1.pdf]

**Table S1.** Pathway Analysis Result with MetPA.

| No | Pathway Name                               | Total | Expected | Hits | Raw p  | Impact |
|----|--------------------------------------------|-------|----------|------|--------|--------|
| 1  | Ether lipid metabolism                     | 13    | 0.0835   | 1    | 0.0806 | 0.2143 |
| 2  | Glycerophospholipid metabolism             | 30    | 0.1926   | 3    | 0.0007 | 0.2065 |
| 3  | Purine metabolism                          | 68    | 0.4365   | 1    | 0.3616 | 0.0114 |
| 4  | Tryptophan metabolism                      | 41    | 0.2632   | 1    | 0.2350 | 0.0019 |
| 5  | Arachidonic acid metabolism                | 36    | 0.2311   | 2    | 0.0206 | 0      |
| 6  | Synthesis and degradation of ketone bodies | 5     | 0.0321   | 1    | 0.0317 | 0      |
| 7  | Linoleic acid metabolism                   | 5     | 0.0321   | 1    | 0.0317 | 0      |
| 8  | alpha-Linolenic acid metabolism            | 9     | 0.0578   | 1    | 0.0565 | 0      |
| 9  | Folate biosynthesis                        | 16    | 0.1027   | 1    | 0.0984 | 0      |
| 10 | Butanoate metabolism                       | 20    | 0.1284   | 1    | 0.1216 | 0      |
| 11 | Sphingolipid metabolism                    | 21    | 0.1348   | 1    | 0.1274 | 0      |

Note: Total is the total number of compounds in the pathway; the Hits is the actually matched number from the user uploaded data; the Impact is the pathway impact value calculated from pathway topology analysis.
